# Supplementary material
Source: PubMed Central journal article supplement (PMC2730876)
Supplement: jc.2008-2109_1.pdf [file jc.2008-2109_1.pdf]

## SUPPLEMENTARY MATERIAL

Supplemental Table 1. Primers used for resequencing the human GR $\alpha$  Gene (*NR3C1*).

| <i>NR3C1</i> Resequencing Primers |                          |                                                   |                                          |                                                         |
|-----------------------------------|--------------------------|---------------------------------------------------|------------------------------------------|---------------------------------------------------------|
|                                   | Forward<br>or<br>Reverse | Region                                            | M13 Tag Sequence                         | Primer Sequence                                         |
| 1                                 | F<br>R                   | 5'FR of Exon 1A1,<br>Exon 1A1, Exon 1A2, Exon 1A3 |                                          | CCAACAAAAGCACAAAGGAAA<br>TATCCAGCACACAACATCAGC          |
| 2                                 | F<br>R                   | Highly conserved region in intron A3              |                                          | TAAAAATGAAGCTGCCACTCTCT<br>TTATGGTCTTAAGCATGGCTTTG      |
| 3                                 | F<br>R                   | 5'FR of Exon 1D                                   |                                          | TGAAGGGAGAATAATTGGGAAC<br>GGTAGCCTAAGCCGTCCTTC          |
| 4                                 | F<br>R                   | 5'FR of Exon 1D, Exon 1D                          |                                          | CCCTCTTCTTTCCGAGGTG<br>CCCGAATCTTGACATTTGCT             |
| 5                                 | F<br>R                   | Exon 1E, Exon 1B                                  |                                          | GCCCTCTCCTTCTCAGGAC<br>TGCACTTCGAAAGGGGCTAC             |
| 6                                 | F<br>R                   | Exon 1F                                           |                                          | GGTTCTGCTTTGCAACTTCTCT<br>GAACGATGCAACCTGTTGGT          |
| 7                                 | F<br>R                   | Exon 1C                                           |                                          | ACCCTTTTTCTGGGGAGTT<br>ACTCCCCGAGGCTAATAAAAGT           |
| 8                                 | F<br>R                   | Exon 1H                                           |                                          | ATATTTCCCTCCTGCTCCTTCT<br>ATTACGGTTACAGGGGGTCTTT        |
| 9                                 | F<br>R                   | Exon 2                                            |                                          | TTCAATTAACAAGCTGCCTCTTACT<br>AGCACATGAATCTTTAGAGAACACA  |
| 10                                | F<br>R                   | Exon 3                                            |                                          | GCACTTGAAGCCAGAGTTCAC<br>CCCTCCTCTCCCCTTTAACT           |
| 11                                | F<br>R                   | Exon 4                                            |                                          | CAATACCTGTGGGTGTCTTGG<br>TTCCCATTTTTATTGGGCAGT          |
| 12                                | F<br>R                   | Exon 5                                            | TGTA AACGACGGCCAGT                       | TTGAATAAACTGTGTAGCGCAGA<br>CACCTGTATTACCTGACTCTCC       |
| 13                                | F<br>R                   | Exon 6                                            |                                          | AAAAACACAAGAGGGTTTGTGAGT<br>TCTATTTCCAGTTTGCCTAGATCC    |
| 14                                | F<br>R                   | Exon 7                                            |                                          | CCAAGATGCAGGAAGTTAAGG<br>TGGTGTCACTTACTGTGCCTTT         |
| 15                                | F<br>R                   | Highly conserved region in intron 7               |                                          | GCAAGGTAAGGGACAAGGTTC<br>CATTTCAAGCCATTTTCCTGA          |
| 16                                | F<br>R                   | Exon 8, Exon 9 $\alpha$                           | TGTA AACGACGGCCAGT<br>CAGGAAACAGCTATGACC | TCCTTTAACTGACTTCATCTTAACCTT<br>CAACAAAACCTCTACAGGACAACT |
| 17                                | F<br>R                   | 3'-UTR                                            |                                          | GCTGAAATCATCACCAATCAGA<br>AGCTGAGCTTTCTGTACCATC         |
| 18                                | F<br>R                   | 3'-UTR                                            |                                          | GCTGTAACACAGCTGAGAGACTTT<br>TGTGAGATGTGCTTTCTGGTTTTA    |

**NR3C1 site-directed Mutagenesis Primers**

|    | Forward<br>or<br>Reverse | SNP                   | Primer Sequence                           |
|----|--------------------------|-----------------------|-------------------------------------------|
| 1  | F                        | Arg (23) Lys          | GCTCAGGAGAAGGGAGATGTGAT                   |
|    | R                        |                       | CCATCACATCTCCCTTCTCCTGA                   |
| 2  | F                        | Phe (65) Val          | GACTTTTGGTTGATGTTCCAAAAGGCT               |
|    | R                        |                       | GCCTTTTGGAACATCAACCAAAAGT                 |
| 3  | F                        | Gly (99) Arg          | CAAAAGTGATGAGAAATGACCTGGGAT               |
|    | R                        |                       | CCCAGGTCATTTCTCATCACTTTTGTT               |
| 4  | F                        | Ala (229) Thr         | GCTTTCCTCTGACGGGAGAAGACGA                 |
|    | R                        |                       | TCGTCTTCTCCCGTCAGAGGAGAAAG                |
| 5  | F                        | Ile (292) Val         | GCACCCCTGGGGTAGTTAAGCAAGAGAAA             |
|    | R                        |                       | TTCTCTTGCTTAACTACCCAGGGGTGCA              |
| 6  | F                        | Ser (325) Gly         | GTTCATGGTGTGGGTACCTCTGGAGGA               |
|    | R                        |                       | CCTCCAGAGGTACCCACACCATGAACA               |
| 7  | F                        | Asn (363) Ser         | GTTGGTCCGAAAGTTGGAATAGGT                  |
|    | R                        |                       | CACCTATTCCAACTTTCGGAACCAA                 |
| 8  | F                        | Thr (504) Ser         | TTCAGCAGGCCTCTACAGGAGTCTCA                |
|    | R                        |                       | GAGACTCCTGTAGAGGCCTGCTGAAT                |
| 9  | F                        | Asp (687) Glu         | GAGCTATTTGAGGAAATTAGAATGA                 |
|    | R                        |                       | CATTCTAATTTCTCAAATAGCTCT                  |
| 10 | F                        | E2p879G>A             | GCACCCCTGGGGTAATTAACAAGAGAACTGGG          |
|    | R                        |                       | CCCAGTTTCTCTTGTTAATTACCCAGGGGTGC          |
| 11 | F                        | E6p1764C>T            | AGGTTTCAGGAACTTACATCTGGATGACCAAATGACC     |
|    | R                        |                       | GGTCATTTGGTCATCCAGATGTAAGTTCCTGAAACCT     |
| 12 | F                        | E8p2034C>T            | TCTCTCAGTTCCTAAGGATGGTCTGAAGAGCCA         |
|    | R                        |                       | TGGCTCTTCAGACCATCCTTAGGAACTGAAGAGA        |
| 13 | F                        | E9p2298T>C            | CAGATACCAAAATATTCAAACGGAAATATCAAAAACTTCTG |
|    | R                        |                       | CAGAAGTTTTTGGATATTTCCGTTTGAATATTTGGTATCTG |
| 14 | F                        | E2p66G>A/Arg (23) Lys | GCAGTGTGCTTGCTCAGGAAAAGGAGATGTGATGGAC     |
|    | R                        |                       | GTCCATCACATCTCCCTTTTCTGAGCAAGCACACTGC     |
