# Supplementary material
Source: PubMed Central journal article supplement (PMC2730876)
Supplement: jc.2008-2109_2.pdf [file jc.2008-2109_2.pdf]

Supplemental Table 2. Probes for EMSA of SNP Cm746T>C and haplotype Cm237delC/Cm238C>T/Cm240G>C in the exon 1C and 5'-FR of exon 1C.

| SNP or Haplotype                    |                                           |         | Probe sequence                     |
|-------------------------------------|-------------------------------------------|---------|------------------------------------|
| Cm746T>C                            | WT<br>(Cm746T)                            | Forward | 5'GCCGCCACCC <u>TTTTCCTGGG</u> 3'  |
|                                     |                                           | Reverse | 5'CCCAGGAAAA <u>AGGGTGGCGGC</u> 3' |
|                                     | Variant<br>(Cm746C)                       | Forward | 5'GCCGCCACCC <u>TTTTCCTGGG</u> 3'  |
|                                     |                                           | Reverse | 5'CCCAGGAAAA <u>AGGGTGGCGGC</u> 3' |
| Cm237delC/<br>Cm238C>T/<br>Cm240G>C | WT<br>(Cm237C/<br>Cm238C /<br>Cm240G)     | Forward | 5'CGCCCGGAAG <u>CCCGACCCGC</u> 3'  |
|                                     |                                           | Reverse | 5'GCGGGTCG <u>GGGCTTCCGGGCG</u> 3' |
|                                     | Variant<br>(Cm237-/<br>Cm238T/<br>Cm240C) | Forward | 5'CGCCCGGAAC <u>CTTCGACCCGC</u> 3' |
|                                     |                                           | Reverse | 5'GCGGGTCG <u>AGGTTCCGGGCG</u> 3'  |

Note: The sequences of SNPs are highlighted by underlining.
