# Supplementary material
Source: PubMed Central journal article supplement (PMC2730876)
Supplement: jc.2008-2109_3.pdf [file jc.2008-2109_3.pdf]

Supplemental Table 3. Parameters for nucleotide diversity of genetic variation in *NR3C1*.

| Ethnic groups | $\pi (\times 10^{-4})$ | $\theta (\times 10^{-4})$ | Tajima's D | P value for<br>Tajima's D |
|---------------|------------------------|---------------------------|------------|---------------------------|
| AA            | $3.455 \pm 1.908$      | $7.285 \pm 1.998$         | -1.649     | 0.097                     |
| CA            | $2.513 \pm 1.453$      | $3.166 \pm 1.000$         | -0.591     | 0.570                     |
| HCA           | $1.632 \pm 1.022$      | $6.912 \pm 1.894$         | -2.376     | 0.014                     |
| MA            | $1.626 \pm 1.019$      | $4.330 \pm 1.273$         | -1.855     | 0.059                     |
