# Supplementary material
Source: PubMed Central journal article supplement (PMC2730876)

**Supplemental Figure 2. Intact cell dexamethasone binding assays of GR $\alpha$  and MR**

(A) Optimization of cell number for intact cell dexamethasone binding assay

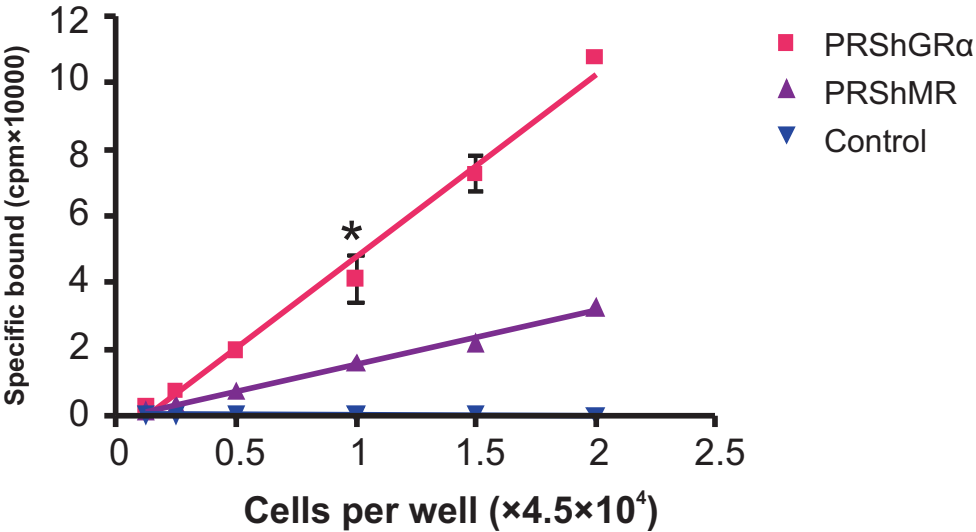

(B) Intact cell dexamethasone binding assay of pRShGR $\alpha$  and pRShMR

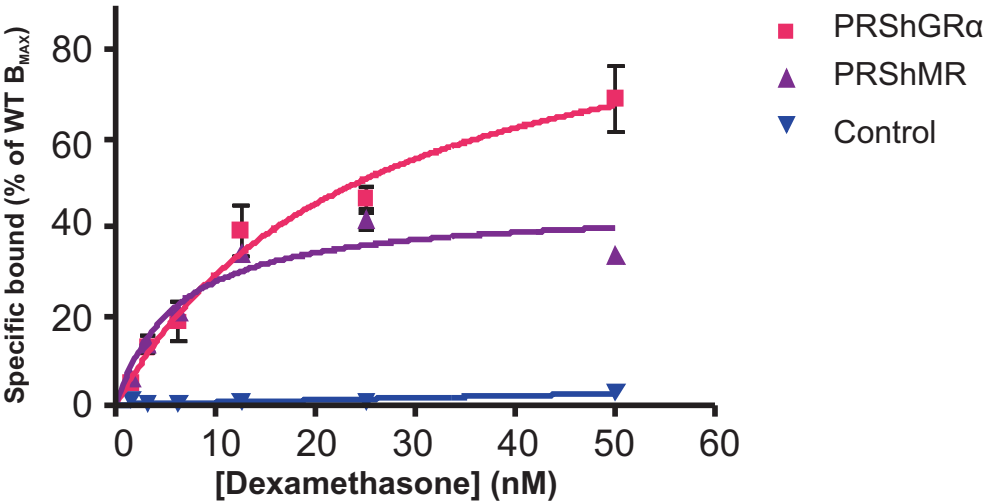

Supplement: jc.2008-2109_5.pdf [file jc.2008-2109_5.pdf]
