# Supplementary material
Source: PubMed Central journal article supplement (PMC2730876)

# Supplemental Figure 1. Human *NR3C1* Gene Linkage Disequilibrium

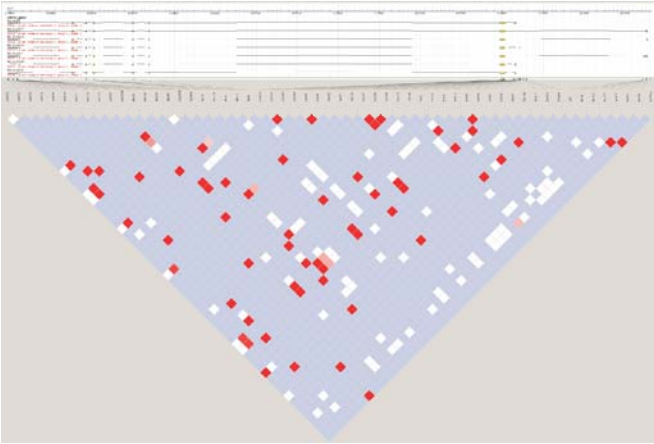

AA

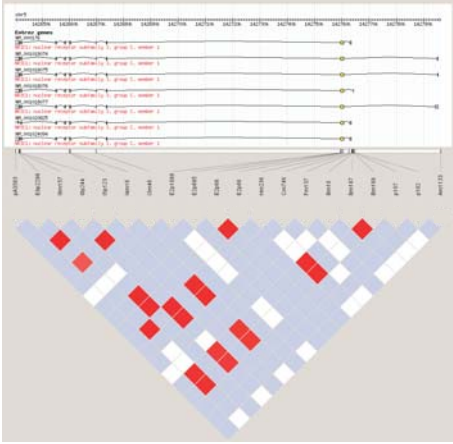

CA

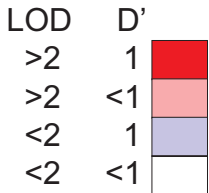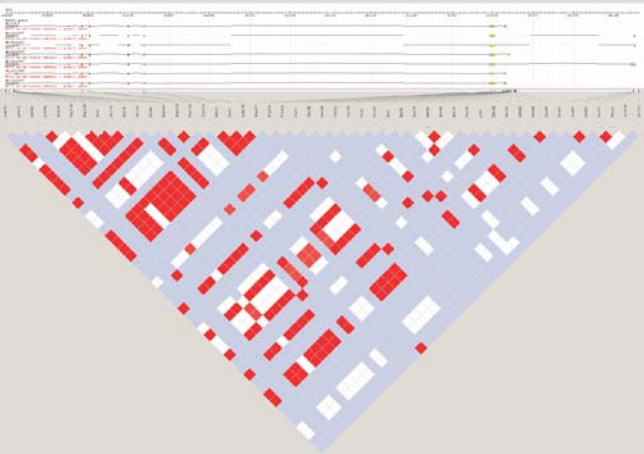

HCA

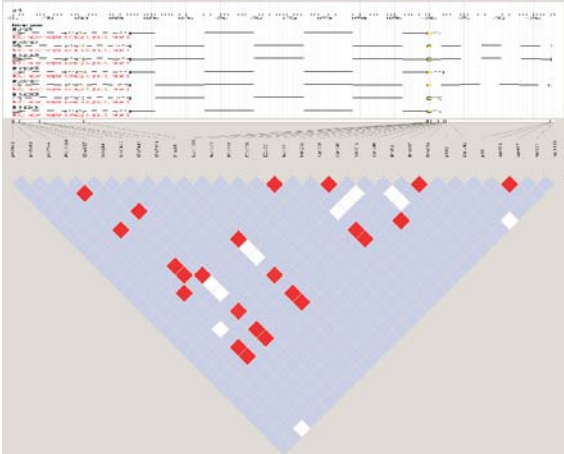

MA

Supplement: jc.2008-2109_4.pdf [file jc.2008-2109_4.pdf]

### Supplemental Figure 3. Transactivation assay of WT GR $\alpha$

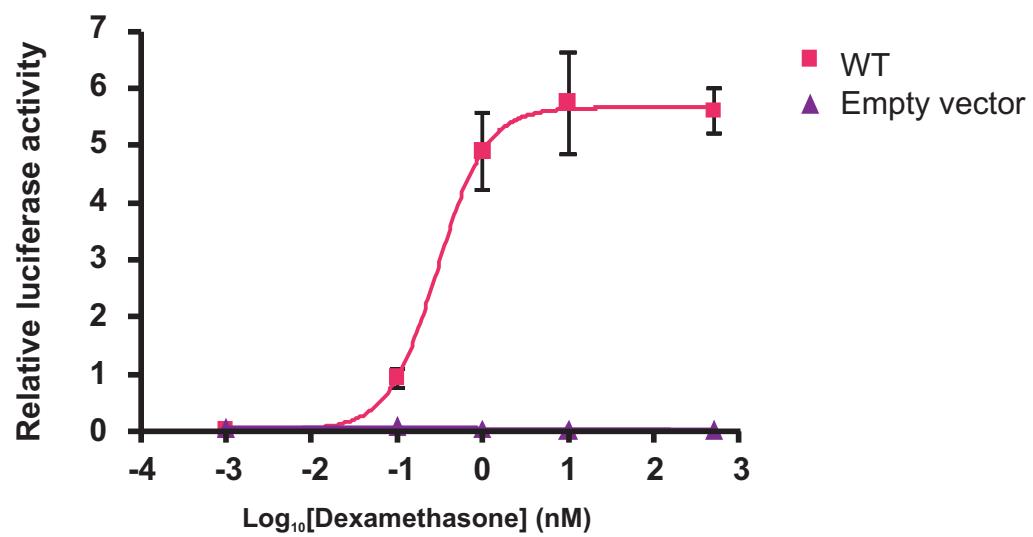

Supplement: jc.2008-2109_6.pdf [file jc.2008-2109_6.pdf]
